# Supplementary material for: Antifungal therapy in patients with pulmonary Candida spp. colonization may have no beneficial effects
Source: PubMed Central journal article supplement (PMC4490727; doi:10.1186/s40560-015-0097-0), 2015-07-03
Supplement: 40560_2015_97_MOESM1_ESM.pdf [file 40560_2015_97_MOESM1_ESM.pdf]

**Additional file 1. Baseline microbiological therapy in patients with isolated pulmonary *Candida spp.* colonization (cohort 1).**

|                                | <b>Antifungal therapy<br/>(n=102)</b> | <b>No antifungal<br/>therapy (n=220)</b> | <b>p-value</b> |
|--------------------------------|---------------------------------------|------------------------------------------|----------------|
| <b>Antifungal drugs, n (%)</b> |                                       |                                          |                |
| Echinocandins                  | 16 (15.7%)                            |                                          |                |
| Fluconazole                    | 19 (18.6%)                            |                                          |                |
| Others <sup>1</sup>            | 4 (3.9%)                              |                                          |                |
| Combined <sup>2</sup>          | 1 (1%)                                |                                          |                |
| None                           | 63 (61.8%)                            |                                          |                |
|                                |                                       |                                          |                |
| <b>Antibiotics, n (%)</b>      |                                       |                                          |                |
| Aminoglycosides                | 2 (2%)                                | 8 (3.6%)                                 | 0.113          |
| Penicillin                     | 21 (20.6%)                            | 55 (25%)                                 | 0.402          |
| Cephalosporins                 | 25 (24.5%)                            | 39 (17.7%)                               | 0.177          |
| Quinolones                     | 31 (30.4%)                            | 38 (17.3%)                               | <b>0.009</b>   |
| Macrolides                     | 1 (1%)                                | 9 (4.1%)                                 | 0.179          |
| Carbapenems                    | 37 (36.3%)                            | 64 (29.1%)                               | 0.2            |
| Glycopeptides                  | 46 (45.1%)                            | 58 (26.4%)                               | <b>0.001</b>   |
| Linezolid                      | 9 (8.8%)                              | 6 (2.7%)                                 | <b>0.022</b>   |
| Daptomycin                     | 1 (1%)                                | 1 (0.5%)                                 | 0.534          |
| Others <sup>3</sup>            | 16 (15.7%)                            | 19 (8.6%)                                | 0.082          |

<sup>1</sup> Amphotericin B, Voriconazole.

<sup>2</sup> at least two different antifungal drugs.

<sup>3</sup> Chloramphenicol, Cotrimoxazole, Doxycycline, Fosfomycin, Fusidic acid, Metronidazole, Quinupristin/Dalfopristin, Rifampicin, Tigecycline, Trimethoprim/Sulfamethoxazole.
