# Supplementary material for: Antifungal therapy in patients with pulmonary Candida spp. colonization may have no beneficial effects
Source: PubMed Central journal article supplement (PMC4490727; doi:10.1186/s40560-015-0097-0), 2015-07-03
Supplement: 40560_2015_97_MOESM2_ESM.pdf [file 40560_2015_97_MOESM2_ESM.pdf]

**Additional file 2. Baseline pulmonary microbiological findings in patients with isolated pulmonary *Candida spp.* colonization (cohort 1).**

|                                               | <b>Antifungal therapy<br/>(n=102)</b> | <b>No antifungal<br/>therapy (n=220)</b> | <b>p-value</b> |
|-----------------------------------------------|---------------------------------------|------------------------------------------|----------------|
| <b><i>Candida spp.</i>, n (%)</b>             |                                       |                                          |                |
| <i>albicans</i>                               | 71 (69.6%)                            | 180 (81.8%)                              | <b>0.02</b>    |
| <i>glabrata</i>                               | 18 (17.6%)                            | 37 (16.8%)                               | 0.874          |
| <i>tropicalis</i>                             | 11 (10.8%)                            | 15 (6.8%)                                | 0.271          |
| <i>krusei</i>                                 | 6 (5.9%)                              | 1 (0.5%)                                 | <b>0.005</b>   |
| Others <sup>1</sup>                           | 8 (7.8%)                              | 9 (4.1%)                                 | 0.184          |
| Co-Infection with <i>Aspergillus</i> , n (%)  | 2 (2%)                                | 3 (1.4%)                                 | 0.654          |
|                                               |                                       |                                          |                |
| <b>Any pulmonary bacterial finding, n (%)</b> | 25 (25%)                              | 94 (43%)                                 | <b>0.002</b>   |
| Gram positive                                 | 6 (5.9%)                              | 17 (7.7%)                                | 0.647          |
| Gram negative                                 | 21 (20.6%)                            | 84 (38.2%)                               | <b>0.002</b>   |
| <i>E. coli</i>                                | 5 (4.9%)                              | 21 (9.5%)                                | 0.19           |
| <i>Pseudomonas aeruginosa</i>                 | 5 (4.9%)                              | 14 (6.4%)                                | 0.8            |
| <i>Klebsiella pneumonia</i>                   | 3 (2.9%)                              | 9 (4.1%)                                 | 0.759          |
| <i>Enterobacter species</i>                   | 3 (2.9%)                              | 9 (4.1%)                                 | 0.759          |
| Others <sup>2</sup>                           | 5 (4.9%)                              | 31 (14.1%)                               | <b>0.014</b>   |
| <i>multi drug resistant pathogens</i>         | 2 (2%)                                | 5 (2.3%)                                 | 1              |

<sup>1</sup> *Candida famata*, *kefyr*, *lipolytica*, *lusitaniae* and *parapsilosis*.

<sup>2</sup> *Stenotrophomonas*, *Proteus mirabilis*, *Serratia marcescens*, *Citrobacter koseri*, *Actinobacter baumannii*, *Klebsiella ocytoca*, *Proteus vulgaris*, *Citrobacter freundii*, *Morganella morganii*.
