# Supplementary material for: Antifungal therapy in patients with pulmonary Candida spp. colonization may have no beneficial effects
Source: PubMed Central journal article supplement (PMC4490727; doi:10.1186/s40560-015-0097-0), 2015-07-03
Supplement: 40560_2015_97_MOESM3_ESM.pdf [file 40560_2015_97_MOESM3_ESM.pdf]

**Additional file 5. Inflammatory mediators in patients with isolated pulmonary *Candida spp.* colonization (cohort 1).**

|                      | <b>Antifungal therapy<br/>(n=102)</b> | <b>No antifungal therapy<br/>(n=220)</b> | <b>p-value</b>   |
|----------------------|---------------------------------------|------------------------------------------|------------------|
| <b>Leucocytes</b>    |                                       |                                          |                  |
| day 1 (n=321)        | 14.3 (10.2;19.7)                      | 12.4 (8.7;17.1)                          | <b>0.02</b>      |
| day 3 (n=249)        | 16.4 (12;21.5)                        | 12.8 (9.4;17.8)                          | <b>&lt;0.001</b> |
| day 7 (n=308)        | 16 (11.1;21.7)                        | 12.8 (9.6;17.4)                          | <b>0.004</b>     |
| day 14 (n=84)        | 13.7 (10;16)                          | 11.7 (7.9;14.5)                          | 0.14             |
| <b>PCT</b>           |                                       |                                          |                  |
| day 1 (n=305)        | 2 (1;7)                               | 1 (0;4)                                  | <b>0.024</b>     |
| day 3 (n=243)        | 2 (1;9)                               | 1 (0;3)                                  | <b>&lt;0.001</b> |
| day 7 (n=164)        | 1 (1;4)                               | 1 (0;2)                                  | <b>0.004</b>     |
| day 14 (n=83)        | 1 (1;2)                               | 1 (0;1)                                  | 0.131            |
| <b>CRP</b>           |                                       |                                          |                  |
| day 1 (n=314)        | 15.3 (9.6;25.2)                       | 13.1 (7;22)                              | 0.09             |
| day 3 (n=241)        | 14.8 (8.9;23)                         | 11.7 (8;21)                              | 0.087            |
| day 7 (n=153)        | 9.9 (6.1;16)                          | 9 (6;14)                                 | 0.389            |
| day 14 (n=82)        | 9.5 (5.5;15.4)                        | 9.1 (5;14)                               | 0.625            |
| <b>Interleukin-6</b> |                                       |                                          |                  |
| day 1 (n=225)        | 174 (72;548)                          | 101 (52;303)                             | <b>0.041</b>     |
| day 3 (n=192)        | 96 (47;263)                           | 62 (30;148)                              | <b>0.006</b>     |
| day 7 (n=106)        | 78 (35;212)                           | 49 (22;103)                              | <b>0.023</b>     |
| day 14 (n=52)        | 91 (48;212)                           | 58 (29;124)                              | 0.118            |
| <b>LBP</b>           |                                       |                                          |                  |
| day 1 (n=216)        | 23 (16;35)                            | 24 (15;32)                               | 0.917            |
| day 3 (n=185)        | 23 (16;36)                            | 22 (15;34)                               | 0.826            |
| day 7 (n=102)        | 17 (10;28)                            | 17 (10;28)                               | 0.76             |
| day 14 (n=50)        | 17 (11;26)                            | 18 (12;24)                               | 1                |
| <b>Thrombocytes</b>  |                                       |                                          |                  |
| day 1 (n=321)        | 116 (66;200)                          | 154 (92;223)                             | <b>0.013</b>     |
| day 3 (n=249)        | 113 (63;227)                          | 150 (92;245)                             | <b>0.049</b>     |
| day 7 (n=164)        | 146 (87;255)                          | 204 (87;316)                             | 0.127            |
| day 14 (n=84)        | 161 (89;288)                          | 213 (123;187)                            | 0.061            |

Data are presented in median and (25%/75%) quartile. PCT – procalcitonin, CRP – c-reactive-protein, LBP – lipopolysaccharide-binding protein.
