# Supplementary material for: Antifungal therapy in patients with pulmonary Candida spp. colonization may have no beneficial effects
Source: PubMed Central journal article supplement (PMC4490727; doi:10.1186/s40560-015-0097-0), 2015-07-03
Supplement: 40560_2015_97_MOESM4_ESM.pdf [file 40560_2015_97_MOESM4_ESM.pdf]

**Additional file 3. Microbiological therapy in patients with isolated pulmonary *Candida spp.* colonization during observation period (cohort 1).**

|                                           | Antifungal therapy (n=102) | No antifungal therapy (n= 220) | p-value          |
|-------------------------------------------|----------------------------|--------------------------------|------------------|
| <b>Antifungal drugs, n (%)</b>            |                            |                                |                  |
| Echinocandins                             | 51 (50%)                   |                                |                  |
| Fluconazole                               | 56 (54.9%)                 |                                |                  |
| Others <sup>1</sup>                       | 17 (16.7%)                 |                                |                  |
| Combined <sup>2</sup>                     | 21 (20.6%)                 |                                |                  |
| <b>Start of antifungal therapy (days)</b> | 4 (1;6)                    |                                |                  |
| <b>Duration antifungal therapy (days)</b> | 9 (5;15)                   |                                |                  |
|                                           |                            |                                |                  |
| <b>Antibiotics, n (%)</b>                 | 101 (99%)                  | 185 (84.1%)                    | <b>&lt;0.001</b> |
| Aminoglycosides                           | 8 (7.8%)                   | 8 (3.6%)                       | 0.165            |
| Penicillin                                | 40 (39.2%)                 | 65 (29.5%)                     | 0.097            |
| Cephalosporins                            | 18 (17.6%)                 | 47 (21.4%)                     | 0.461            |
| Quinolones                                | 66 (64.7%)                 | 61 (27.7%)                     | <b>&lt;0.001</b> |
| Macrolides                                | 2 (2%)                     | 10 (4.5%)                      | 0.352            |
| Carbapenems                               | 67 (65.7%)                 | 81 (36.8%)                     | <b>&lt;0.001</b> |
| Glycopeptides                             | 67 (65.7%)                 | 67 (30.5%)                     | <b>&lt;0.001</b> |
| Linezolid                                 | 23 (22.5%)                 | 9 (4.1%)                       | <b>&lt;0.001</b> |
| Daptomycin                                | 5 (4.9%)                   | 1 (0.5%)                       | <b>0.013</b>     |
| Others <sup>3</sup>                       | 30 (29.4%)                 | 22 (10%)                       | <b>&lt;0.001</b> |

Data are presented as median (25%;75% quartile).

<sup>1</sup> Amphotericin B, Voriconazole.

<sup>2</sup> at least two different antifungal drugs.

<sup>3</sup> Chloramphenicol, Cotrimoxazole, Doxycycline, Fosfomycin, Fusidic acid, Metronidazole, Quinupristin/Dalfopristin, Rifampicin, Tigecycline, Trimethoprim/Sulfamethoxazole.
