# Supplementary material for: Antifungal therapy in patients with pulmonary Candida spp. colonization may have no beneficial effects
Source: PubMed Central journal article supplement (PMC4490727; doi:10.1186/s40560-015-0097-0), 2015-07-03
Supplement: 40560_2015_97_MOESM5_ESM.pdf [file 40560_2015_97_MOESM5_ESM.pdf]

**Additional file 4. Pulmonary microbiological findings in patients with isolated pulmonary *Candida spp.* colonization during observation period (cohort 1).**

|                                                   | Antifungal therapy<br>(n=102) | No antifungal therapy<br>(n=220) | p-value      |
|---------------------------------------------------|-------------------------------|----------------------------------|--------------|
| <b><i>Candida spp.</i>, n (%)</b>                 |                               |                                  |              |
| <i>albicans</i>                                   | 78 (76.5%)                    | 183 (83.2%)                      | 0.17         |
| <i>glabrata</i>                                   | 31 (30.4%)                    | 42 (19.1%)                       | <b>0.031</b> |
| <i>tropicalis</i>                                 | 16 (15.7%)                    | 18 (8.2%)                        | 0.051        |
| <i>krusei</i>                                     | 6 (5.9%)                      | 1 (0.5%)                         | <b>0.005</b> |
| Others <sup>1</sup>                               | 15 (14.7%)                    | 23 (10.5%)                       | 0.271        |
| Co-Infection with <i>Aspergillus</i> , n (%)      | 2 (2%)                        | 3 (1.4%)                         | 0.654        |
|                                                   |                               |                                  |              |
| <b>Any new pulmonary bacterial finding, n (%)</b> | 53 (52%)                      | 120 (55%)                        | 0.719        |
| Gram positive                                     | 15 (14.7%)                    | 25 (11.4%)                       | 0.468        |
| Gram negative                                     | 48 (47.1%)                    | 107 (48.6%)                      | 0.811        |
| <i>E. Coli</i>                                    | 11 (10.8%)                    | 25 (11.4%)                       | 1            |
| <i>Pseudomonas aeruginosa</i>                     | 12 (11.8%)                    | 15 (6.8%)                        | 0.193        |
| <i>Klebsiella pneumonia</i>                       | 8 (7.8%)                      | 14 (13.7%)                       | 0.639        |
| <i>Enterobacter species</i>                       | 8 (7.8%)                      | 13 (5.9%)                        | 0.628        |
| Others <sup>2</sup>                               | 9 (8.8%)                      | 40 (18.2%)                       | <b>0.031</b> |
| multi drug resistant pathogens                    | 6 (5.9%)                      | 7 (3.2%)                         | 0.36         |

<sup>1</sup> *Candida famata*, *kefyr*, *lipolytica*, *lusitaniae* and *parapsilosis*.

<sup>2</sup> *Stenotrophomonas*, *Proteus mirabilis*, *Serratia marcescens*, *Citrobacter koseri*, *Actinobacter baumannii*, *Klebsiella ocytoca*, *Proteus vulgaris*, *Citrobacter freundii*, *Morganella morgannii*, *Burkholderia cepacia*.
