# Supplementary material for: Antifungal therapy in patients with pulmonary Candida spp. colonization may have no beneficial effects
Source: PubMed Central journal article supplement (PMC4490727; doi:10.1186/s40560-015-0097-0), 2015-07-03
Supplement: 40560_2015_97_MOESM6_ESM.pdf [file 40560_2015_97_MOESM6_ESM.pdf]

**Additional file 6. Patients with isolated pulmonary *Candida spp.* colonization - stepwise backwards elimination for survival time (cohort 1).**

|               |            | Exp(B) | 95% CI for Exp(B) |             | B     | Wald   | Sign.        |
|---------------|------------|--------|-------------------|-------------|-------|--------|--------------|
|               |            |        | Lower bound       | Upper bound |       |        |              |
| <b>Step 1</b> | Therapy    | 1.198  | 0.810             | 1.771       | 0.180 | 0.0817 | 0.366        |
|               | SAPS II    | 1.030  | 1.010             | 1.050       | 0.029 | 8.764  | 0.003        |
|               | SOFA score | 1.098  | 1.033             | 1.168       | 0.094 | 8.905  | 0.003        |
|               | Age        | 1.019  | 1.002             | 1.035       | 0.018 | 4.847  | 0.028        |
|               | Cancer     | 1.298  | 0.835             | 2.017       | 0.261 | 1.341  | 0.247        |
| <b>Step 2</b> | SAPS II    | 1.028  | 1.009             | 1.048       | 0.028 | 8.085  | 0.004        |
|               | SOFA score | 1.095  | 1.030             | 1.164       | 0.091 | 8.468  | 0.004        |
|               | Age        | 1.019  | 1.003             | 1.036       | 0.019 | 5.281  | 0.022        |
|               | Cancer     | 1.336  | 0.863             | 2.066       | 0.289 | 1.691  | 0.193        |
| <b>Step 3</b> | SAPS II    | 1.028  | 1.008             | 1.048       | 0.028 | 7.983  | <b>0.005</b> |
|               | SOFA score | 1.094  | 1.030             | 1.163       | 0.090 | 8.450  | <b>0.004</b> |
|               | Age        | 1.020  | 1.004             | 1.037       | 0.020 | 5.855  | <b>0.016</b> |

Exp(B) – odds ratio, CI – confidence interval, B – Not standardized regression coefficient, Wald – Wald-statistics, Sign. –Significance (p-value). SAPS II - Simplified Acute Physiology Score II ( $p < 0.005$ ), SOFA - Sequential Organ Failure Assessment ( $p < 0.005$ ) and Age ( $p < 0.05$ ) are independent variables that significantly influence the dependent variable (survival time).
