# Supplementary material for: Antifungal therapy in patients with pulmonary Candida spp. colonization may have no beneficial effects
Source: PubMed Central journal article supplement (PMC4490727; doi:10.1186/s40560-015-0097-0), 2015-07-03
Supplement: 40560_2015_97_MOESM7_ESM.pdf [file 40560_2015_97_MOESM7_ESM.pdf]

**Additional file 7. Baseline pulmonary microbiological findings and therapy in patients with isolated pulmonary *Candida spp.* colonization without pre-existing pneumonia (cohort 2).**

|                                               | <b>Antifungal therapy<br/>(n=44)</b> | <b>No antifungal<br/>therapy (n=131)</b> | <b>p-value</b>   |
|-----------------------------------------------|--------------------------------------|------------------------------------------|------------------|
| <b><i>Candida spp.</i>, n (%)</b>             |                                      |                                          |                  |
| <i>albicans</i>                               | 30 (68.2%)                           | 112 (85.5%)                              | <b>0.015</b>     |
| <i>glabrata</i>                               | 7 (15.9%)                            | 20 (15.3%)                               | 1                |
| <i>tropicalis</i>                             | 4 (9.1%)                             | 6 (4.6%)                                 | 0.273            |
| <i>krusei</i>                                 | 3 (6.8%)                             | 1 (1%)                                   | <b>0.05</b>      |
| others <sup>1</sup>                           | 3 (6.8%)                             | 3 (2.3%)                                 | 0.168            |
| Co-Infection with <i>Aspergillus</i> , n (%)  | 1 (2.3%)                             | 1 (0.8%)                                 | 0.441            |
|                                               |                                      |                                          |                  |
| <b>Any pulmonary bacterial finding, n (%)</b> | <b>8 (18.2%)</b>                     | <b>53 (40.5%)</b>                        | <b>0.01</b>      |
| Gram positive                                 | 3 (6.8%)                             | 13 (9.9%)                                | 0.764            |
| Gram negative                                 | 7 (15.9%)                            | 45 (34.4%)                               | <b>0.022</b>     |
| <i>E. Coli</i>                                | 3 (6.8%)                             | 9 (6.9%)                                 | 1                |
| <i>Pseudomonas aeruginosa</i>                 | 0 (0%)                               | 7 (5.3%)                                 | 0.194            |
| <i>Klebsiella pneumonia</i>                   | 1 (2.3%)                             | 5 (3.8%)                                 | 1                |
| <i>Enterobacter species</i>                   | 0 (0%)                               | 4 (3.1%)                                 | 0.573            |
| Others <sup>2</sup>                           | 3 (6.8%)                             | 20 (15.3%)                               | 0.2              |
| <i>multi drug resistant pathogens</i>         | 0 (0%)                               | 1 (0.8%)                                 | 1                |
| <b>Antifungal treatment, n (%)</b>            | <b>17 (38.6%)</b>                    |                                          |                  |
| <b>Antibiotic treatment, n (%)</b>            | <b>42 (96%)</b>                      | <b>92 (70.2%)</b>                        | <b>&lt;0.001</b> |

<sup>1</sup> *Candida famata, lusitaniae* and *parapsilosis*.

<sup>2</sup> *Stenotrophomonas, Proteus mirabilis, Serratia marcescens, Citrobacter koseri, Actinetobacter baumannii, Proteus vulgaris, Citrobacter freundii, Morganella morgannii,*
