# Supplementary material for: Antifungal therapy in patients with pulmonary Candida spp. colonization may have no beneficial effects
Source: PubMed Central journal article supplement (PMC4490727; doi:10.1186/s40560-015-0097-0), 2015-07-03
Supplement: 40560_2015_97_MOESM8_ESM.pdf [file 40560_2015_97_MOESM8_ESM.pdf]

**Additional file 8. Pulmonary microbiological findings and therapy in patients with isolated pulmonary *Candida spp.* colonization without pre-existing pneumonia during observation period (cohort 2).**

|                                                    | <b>Antifungal therapy (n=44)</b> | <b>No antifungal therapy (n=131)</b> | <b>p-value</b>   |
|----------------------------------------------------|----------------------------------|--------------------------------------|------------------|
| <b><i>Candida spp.</i>, n (%)</b>                  |                                  |                                      |                  |
| <i>albicans</i>                                    | 34 (77.3%)                       | 114 (87%)                            | 0.148            |
| <i>glabrata</i>                                    | 16 (26.4%)                       | 24 (18.3%)                           | <b>0.021</b>     |
| <i>tropicalis</i>                                  | 6 (13.6%)                        | 7 (5.3%)                             | 0.094            |
| <i>krusei</i>                                      | 3 (6.8%)                         | 1 (0.8%)                             | <b>0.05</b>      |
| others <sup>1</sup>                                | 4 (9.1%)                         | 3 (2.3%)                             | 0.068            |
| <b>Co-infection with <i>Aspergillus</i>, n (%)</b> | 1 (2.3%)                         | 1 (0.8%)                             | 0.441            |
| <b>Any new bacterial finding, n (%)</b>            | 23 (52.3%)                       | 68 (51.9%)                           | 1                |
| Gram positive                                      | 8 (18.2%)                        | 17 (13%)                             | 0.456            |
| Gram negative                                      | 21 (47.7%)                       | 58 (44.3%)                           | 0.728            |
| <i>E. Coli</i>                                     | 5 (11.4%)                        | 11 (8.4%)                            | 0.553            |
| <i>Pseudomonas aeruginosa</i>                      | 5 (11.4%)                        | 7 (5.3%)                             | 0.18             |
| <i>Klebsiella pneumonia</i>                        | 1 (2.3%)                         | 8 (6.1%)                             | 0.453            |
| <i>Enterobacter species</i>                        | 4 (9.1%)                         | 5 (3.8%)                             | 0.232            |
| Other gram negative bacteria <sup>2</sup>          | 6 (13.6%)                        | 27 (20.6%)                           | 0.377            |
| <i>multi drug resistant pathogens</i>              | 3 (6.8%)                         | 3 (2.3%)                             | 0.168            |
| <b>Antibiotic treatment, n (%)</b>                 | 44 (100%)                        | 99 (75.6%)                           | <b>&lt;0.001</b> |

<sup>1</sup> *Candida famata, lusitaniae* and *parapsilosis*.

<sup>2</sup> *Stenotrophomonas, Proteus mirabilis, Serratia marcescens, Citrobacter koseri, Actinetobacter baumannii, Proteus vulgaris, Citrobacter freundii, Morganella morgannii,*
