# Supplementary material for: Antifungal therapy in patients with pulmonary Candida spp. colonization may have no beneficial effects
Source: PubMed Central journal article supplement (PMC4490727; doi:10.1186/s40560-015-0097-0), 2015-07-03
Supplement: 40560_2015_97_MOESM9_ESM.pdf [file 40560_2015_97_MOESM9_ESM.pdf]

**Additional file 9. Patients with isolated pulmonary *Candida spp.* colonization without pre-existing pneumonia - stepwise backwards elimination for survival time (cohort 2).**

|               |            | Exp(B) | 95% CI for Exp(B) |             | B      | Wald  | p-value      |
|---------------|------------|--------|-------------------|-------------|--------|-------|--------------|
|               |            |        | Lower bound       | Upper bound |        |       |              |
| <b>Step 1</b> | Therapy    | 0.854  | 0.467             | 1.561       | -0.158 | 0.262 | 0.609        |
|               | SAPS II    | 1.022  | 0.993             | 1.051       | 0.021  | 2.243 | 0.134        |
|               | SOFA score | 1.108  | 1.011             | 1.214       | 0.102  | 4.766 | 0.029        |
|               | Age        | 1.014  | 0.990             | 1.039       | 0.014  | 1.301 | 0.254        |
|               | Cancer     | 0.995  | 0.506             | 1.956       | 0.005  | 0.000 | 0.988        |
| <b>Step 2</b> | Therapy    | 0.855  | 0.469             | 1.558       | -0.157 | 0.263 | 0.608        |
|               | SAPS II    | 1.022  | 0.993             | 1.051       | 0.021  | 2.254 | 0.133        |
|               | SOFA score | 1.108  | 1.011             | 1.214       | 0.102  | 4.804 | 0.028        |
|               | Age        | 1.014  | 0.990             | 1.039       | 0.014  | 1.304 | 0.253        |
| <b>Step 3</b> | SAPS II    | 1.020  | 0.992             | 1.047       | 0.019  | 1.977 | 0.160        |
|               | SOFA score | 1.106  | 1.010             | 1.212       | 0.101  | 4.680 | 0.031        |
|               | Age        | 1.015  | 0.992             | 1.040       | 0.015  | 1.574 | 0.210        |
| <b>Step 4</b> | SAPS II    | 1.027  | 1.003             | 1.052       | 0.027  | 5.007 | <b>0.025</b> |
|               | SOFA score | 1.096  | 1.004             | 1.198       | 0.092  | 4.175 | <b>0.041</b> |

Exp(B) – odds ratio, CI – confidence interval, B – Not standardized regression coefficient, Wald – Wald-statistics. SAPS II - Simplified Acute Physiology Score II and SOFA - Sequential Organ Failure Assessment (p<0.05) are independent variables that significantly influence the dependent variable (survival time).
