# Supplementary material for: Antifungal therapy in patients with pulmonary Candida spp. colonization may have no beneficial effects
Source: PubMed Central journal article supplement (PMC4490727; doi:10.1186/s40560-015-0097-0), 2015-07-03
Supplement: 40560_2015_97_MOESM10_ESM.pdf [file 40560_2015_97_MOESM10_ESM.pdf]

**Additional file 10. Patients with isolated pulmonary *Candida spp.* colonization without pre-existing pneumonia - stepwise backwards elimination for pneumonia-free time (cohort 2).**

|               |            | Exp(B) | 95% CI for Exp(B) |             | B      | Wald  | p-value |
|---------------|------------|--------|-------------------|-------------|--------|-------|---------|
|               |            |        | Lower bound       | Upper bound |        |       |         |
| <b>Step 1</b> | Therapy    | 1.048  | 0.536             | 2.046       | 0.046  | 0.018 | 0.892   |
|               | SAPS II    | 0.998  | 0.968             | 1.029       | -0.002 | 0.017 | 0.897   |
|               | SOFA score | 1.029  | 0.923             | 1.146       | 0.028  | 0.265 | 0.606   |
|               | Age        | 1.009  | 0.983             | 1.036       | 0.009  | 0.454 | 0.500   |
|               | Cancer     | 0.714  | 0.263             | 1.938       | -0.337 | 0.438 | 0.508   |
| <b>Step 2</b> | Therapy    | 1.034  | 0.546             | 1.957       | 0.033  | 0.010 | 0.919   |
|               | SOFA score | 1.026  | 0.930             | 1.131       | 0.025  | 0.258 | 0.611   |
|               | Age        | 1.009  | 0.984             | 1.034       | 0.009  | 0.444 | 0.505   |
|               | Cancer     | 0.719  | 0.267             | 1.939       | -0.330 | 0.424 | 0.515   |
| <b>Step 3</b> | SOFA score | 1.027  | 0.933             | 1.130       | 0.026  | 0.289 | 0.591   |
|               | Age        | 1.008  | 0.984             | 1.034       | 0.008  | 0.437 | 0.509   |
|               | Cancer     | 0.716  | 0.266             | 1.922       | -0.335 | 0.441 | 0.507   |
| <b>Step 4</b> | Age        | 1.009  | 0.984             | 1.035       | 0.009  | 0.524 | 0.469   |
|               | Cancer     | 0.740  | 0.278             | 1.968       | -0.301 | 0.363 | 0.547   |
| <b>Step 5</b> | Age        | 1.009  | 0.984             | 1.035       | 0.009  | 0.508 | 0.476   |

Exp(B) – odds ratio, CI – confidence interval, B – Not standardized regression coefficient, Wald – Wald-statistics. No variable independently influences the dependent variable (pneumonia-free time) ( $p > 0.05$ ). SAPS II - Simplified Acute Physiology Score II and SOFA - Sequential Organ Failure Assessment.
